# Supplementary material for: Decline in Handgrip Strength From Midlife to Late-Life is Associated With Dementia in a Japanese Community: The Hisayama Study
Source: PubMed Central journal article supplement (PMC6908846; doi:10.2188/jea.je20180137), 2020-01-05
Supplement: je-30-015-s001.pdf [file je-30-015-s001.pdf]

**eTable 1.** Adjusted hazard ratios for the development of total dementia and its subtypes according to handgrip strength levels in late-life or percent change of handgrip strength from midlife (1973–1974) to late-life (1988)

|                                                                  | Multivariable-adjusted <sup>a</sup> |           |         |
|------------------------------------------------------------------|-------------------------------------|-----------|---------|
|                                                                  | HR                                  | 95% CI    | P value |
| <b>Late-life handgrip strength levels (in 1988)</b>              |                                     |           |         |
| Total dementia                                                   |                                     |           |         |
| High                                                             | 1.00                                | Reference |         |
| Medium                                                           | 1.34                                | 1.04–1.73 | 0.02    |
| Low                                                              | 1.66                                | 1.29–2.13 | <0.01   |
| P for trend                                                      | <0.01                               |           |         |
| AD                                                               |                                     |           |         |
| High                                                             | 1.00                                | Reference |         |
| Medium                                                           | 1.37                                | 0.99–1.91 | 0.06    |
| Low                                                              | 1.96                                | 1.42–2.69 | <0.01   |
| P for trend                                                      | <0.01                               |           |         |
| VaD                                                              |                                     |           |         |
| High                                                             | 1.00                                | Reference |         |
| Medium                                                           | 1.19                                | 0.74–1.93 | 0.47    |
| Low                                                              | 1.99                                | 1.27–3.11 | <0.01   |
| P for trend                                                      | <0.01                               |           |         |
| <b>Percent change ratio (from 1973–1974 to 1988)<sup>a</sup></b> |                                     |           |         |
| Total dementia                                                   |                                     |           |         |
| Increased or unchanged ( $\geq +0\%$ )                           | 1.00                                | Reference |         |
| Mildly decreased (-14 to -1%)                                    | 1.01                                | 0.75–1.34 | 0.96    |
| Severely decreased ( $\leq -15\%$ )                              | 1.51                                | 1.14–1.99 | <0.01   |
| P for trend                                                      | <0.01                               |           |         |
| AD                                                               |                                     |           |         |
| Increased or unchanged ( $\geq +0\%$ )                           | 1.00                                | Reference |         |
| Mildly decreased (-14 to -1%)                                    | 1.28                                | 0.93–1.78 | 0.13    |
| Severely decreased ( $\leq -15\%$ )                              | 1.59                                | 1.14–2.22 | <0.01   |
| P for trend                                                      | <0.01                               |           |         |
| VaD                                                              |                                     |           |         |
| Increased or unchanged ( $\geq +0\%$ )                           | 1.00                                | Reference |         |
| Mildly decreased (-14 to -1%)                                    | 0.89                                | 0.50–1.57 | 0.69    |
| Severely decreased ( $\leq -15\%$ )                              | 1.51                                | 0.89–2.56 | 0.13    |
| P for trend                                                      | 0.15                                |           |         |

AD, Alzheimer's disease; CI, confidence interval; VaD, vascular dementia.

<sup>a</sup> Adjusted for potential confounding covariates measured in 1988 for the analysis of late-life handgrip strength—namely, age, sex, education level, systolic blood pressure, use of antihypertensive agents, impaired glucose tolerance, diabetes mellitus, total cholesterol, body mass index, electrocardiogram abnormalities, smoking habit, alcohol intake, and regular exercise.

**eTable 2.** Hazard ratios for the development of total dementia and its subtypes according to late-life or midlife handgrip strength levels or percent change of handgrip strength from midlife (1973–1974) to late-life (1988) after excluding subjects with history of stroke

| Handgrip strength levels                                                  | Number of events | Number of participants | Person-years at risk | Age- and sex-adjusted |            |         | Multivariable-adjusted <sup>a, b</sup> |           |         |
|---------------------------------------------------------------------------|------------------|------------------------|----------------------|-----------------------|------------|---------|----------------------------------------|-----------|---------|
|                                                                           |                  |                        |                      | HR                    | 95% CI     | P value | HR                                     | 95% CI    | P value |
| <b><i>Late-life handgrip strength levels (in 1988)</i><sup>a</sup></b>    |                  |                        |                      |                       |            |         |                                        |           |         |
| Total dementia                                                            |                  |                        |                      |                       |            |         |                                        |           |         |
| High                                                                      | 150              | 383                    | 6,470                | 1.00                  | Reference  |         | 1.00                                   | Reference |         |
| Medium                                                                    | 135              | 312                    | 4,833                | 1.28                  | 1.01–1.62  | 0.04    | 1.25                                   | 0.96–1.62 | 0.097   |
| Low                                                                       | 135              | 304                    | 4,366                | 1.61                  | 1.28–2.04  | <0.01   | 1.61                                   | 1.24–2.08 | <0.01   |
| P for trend                                                               |                  |                        |                      | <0.01                 |            |         | <0.01                                  |           |         |
| AD                                                                        |                  |                        |                      |                       |            |         |                                        |           |         |
| High                                                                      | 88               | 383                    | 6,470                | 1.00                  | Reference  |         | 1.00                                   | Reference |         |
| Medium                                                                    | 84               | 312                    | 4,833                | 1.35                  | 1.003–1.83 | 0.048   | 1.23                                   | 0.88–1.71 | 0.23    |
| Low                                                                       | 92               | 304                    | 4,366                | 1.93                  | 1.44–2.59  | <0.01   | 1.90                                   | 1.38–2.62 | <0.01   |
| P for trend                                                               |                  |                        |                      | <0.01                 |            |         | <0.01                                  |           |         |
| VaD                                                                       |                  |                        |                      |                       |            |         |                                        |           |         |
| High                                                                      | 44               | 383                    | 6,470                | 1.00                  | Reference  |         | 1.00                                   | Reference |         |
| Medium                                                                    | 33               | 312                    | 4,833                | 1.06                  | 0.68–1.67  | 0.79    | 1.14                                   | 0.68–1.93 | 0.62    |
| Low                                                                       | 44               | 304                    | 4,366                | 1.65                  | 1.08–2.52  | 0.02    | 1.89                                   | 1.16–3.09 | 0.011   |
| P for trend                                                               |                  |                        |                      | 0.02                  |            |         | 0.012                                  |           |         |
| <b><i>Midlife handgrip strength levels (in 1973–1974)</i><sup>b</sup></b> |                  |                        |                      |                       |            |         |                                        |           |         |
| Total dementia                                                            |                  |                        |                      |                       |            |         |                                        |           |         |
| High                                                                      | 125              | 293                    | 4,460                | 1.00                  | Reference  |         | 1.00                                   | Reference |         |
| Medium                                                                    | 120              | 284                    | 4,395                | 0.97                  | 0.75–1.24  | 0.79    | 0.94                                   | 0.73–1.21 | 0.63    |
| Low                                                                       | 119              | 253                    | 3,581                | 1.32                  | 1.02–1.69  | 0.03    | 1.28                                   | 0.99–1.67 | 0.06    |
| P for trend                                                               |                  |                        |                      | 0.04                  |            |         | 0.07                                   |           |         |
| AD                                                                        |                  |                        |                      |                       |            |         |                                        |           |         |
| High                                                                      | 73               | 293                    | 4,460                | 1.00                  | Reference  |         | 1.00                                   | Reference |         |
| Medium                                                                    | 68               | 284                    | 4,395                | 0.93                  | 0.67–1.29  | 0.65    | 0.92                                   | 0.66–1.29 | 0.63    |
| Low                                                                       | 75               | 253                    | 3,581                | 1.48                  | 1.07–2.04  | 0.02    | 1.48                                   | 1.06–2.06 | 0.02    |
| P for trend                                                               |                  |                        |                      | 0.02                  |            |         | 0.03                                   |           |         |
| VaD                                                                       |                  |                        |                      |                       |            |         |                                        |           |         |
| High                                                                      | 36               | 293                    | 4,460                | 1.00                  | Reference  |         | 1.00                                   | Reference |         |
| Medium                                                                    | 37               | 284                    | 4,395                | 1.06                  | 0.67–1.67  | 0.82    | 0.98                                   | 0.67–1.79 | 0.92    |
| Low                                                                       | 33               | 253                    | 3,581                | 1.19                  | 0.74–1.91  | 0.47    | 1.09                                   | 0.61–1.55 | 0.73    |
| P for trend                                                               |                  |                        |                      | 0.48                  |            |         | 0.74                                   |           |         |
| <b>Percent change ratio (from 1973–1974 to 1988)<sup>a</sup></b>          |                  |                        |                      |                       |            |         |                                        |           |         |

|                                        |     |     |       |       |           |       |       |           |       |
|----------------------------------------|-----|-----|-------|-------|-----------|-------|-------|-----------|-------|
| Total dementia                         |     |     |       |       |           |       |       |           |       |
| Increased or unchanged ( $\geq +0\%$ ) | 132 | 328 | 5,495 | 1.00  | Reference |       | 1.00  | Reference |       |
| Mildly decreased (-14 to -1%)          | 103 | 260 | 3,802 | 1.18  | 0.91–1.54 | 1.02  | 1.02  | 0.76–1.37 | 0.89  |
| Severely decreased ( $\leq -15\%$ )    | 106 | 206 | 3,139 | 1.55  | 1.19–2.03 | <0.01 | 1.44  | 1.08–1.92 | 0.013 |
| <i>P</i> for trend                     |     |     |       | <0.01 |           |       | 0.02  |           |       |
| AD                                     |     |     |       |       |           |       |       |           |       |
| Increased or unchanged ( $\geq +0\%$ ) | 77  | 328 | 5,495 | 1.00  | Reference |       | 1.00  | Reference |       |
| Mildly decreased (-14 to -1%)          | 66  | 260 | 3,802 | 1.29  | 0.93–1.80 | 0.13  | 1.17  | 0.81–1.69 | 0.41  |
| Severely decreased ( $\leq -15\%$ )    | 68  | 206 | 3,139 | 1.65  | 1.18–2.32 | <0.01 | 1.65  | 1.15–2.36 | <0.01 |
| <i>P</i> for trend                     |     |     |       | <0.01 |           |       | <0.01 |           |       |
| VaD                                    |     |     |       |       |           |       |       |           |       |
| Increased or unchanged ( $\geq +0\%$ ) | 39  | 328 | 5,495 | 1.00  | Reference |       | 1.00  | Reference |       |
| Mildly decreased (-14 to -1%)          | 23  | 260 | 3,802 | 0.90  | 0.54–1.52 | 0.70  | 0.90  | 0.50–1.64 | 0.73  |
| Severely decreased ( $\leq -15\%$ )    | 28  | 206 | 3,139 | 1.47  | 0.88–2.45 | 0.14  | 1.28  | 0.72–2.29 | 0.41  |
| <i>P</i> for trend                     |     |     |       | 0.19  |           |       | 0.46  |           |       |

AD, Alzheimer's disease; CI, confidence interval; HR, hazard ratio; VaD, vascular dementia.

<sup>a</sup> Adjusted for potential confounding covariates measured in 1988 for the analysis of late-life handgrip strength—namely, age, sex, education level, systolic blood pressure, use of antihypertensive agents, diabetes mellitus, total cholesterol, body mass index, electrocardiogram abnormalities, smoking habit, alcohol intake, and regular exercise.

<sup>b</sup> Adjusted for potential confounding covariates measured in 1973-1974 for the analysis of midlife handgrip strength—namely, age, sex, education level, systolic blood pressure, use of antihypertensive agents, diabetes mellitus, total cholesterol, body mass index, electrocardiogram abnormalities, smoking habit, and alcohol intake.

**eTable 3.** Hazard ratios for the development of total dementia and its subtypes according to the %change of handgrip strength from midlife (1973–1974) to late-life (1988), in which the categories of mildly and severely decreased handgrip strength were divided into the median value of percent change of handgrip strength among the subjects assigned in either category

| Percent change ratio of handgrip strength <sup>a</sup> | Number of Events | Number of participants | Person-years at risk | Age- and sex-adjusted incidence rate <sup>b</sup> | Age- and sex-adjusted |           |                | Multivariable-adjusted <sup>c</sup> |           |                |
|--------------------------------------------------------|------------------|------------------------|----------------------|---------------------------------------------------|-----------------------|-----------|----------------|-------------------------------------|-----------|----------------|
|                                                        |                  |                        |                      |                                                   | HR                    | 95% CI    | <i>P</i> value | HR                                  | 95% CI    | <i>P</i> value |
| Total dementia                                         |                  |                        |                      |                                                   |                       |           |                |                                     |           |                |
| Increased or unchanged ( $\geq +0\%$ )                 | 138              | 334                    | 5,495                | 25.1                                              | 1.00                  | Reference |                | 1.00                                | Reference |                |
| Mildly decreased (-13.7 to -1%)                        | 102              | 250                    | 3,638                | 28.0                                              | 1.16                  | 0.90–1.51 | 0.25           | 0.99                                | 0.74–1.33 | 0.93           |
| Severely decreased ( $\leq -13.6\%$ )                  | 128              | 251                    | 3,303                | 38.8                                              | 1.66                  | 1.29–2.14 | <0.01          | 1.50                                | 1.14–1.98 | <0.01          |
| <i>P</i> for trend                                     |                  |                        |                      | <0.01                                             | <0.01                 |           |                | <0.01                               |           |                |
| AD                                                     |                  |                        |                      |                                                   |                       |           |                |                                     |           |                |
| Increased or unchanged ( $\geq +0\%$ )                 | 81               | 334                    | 5,495                | 14.7                                              | 1.00                  | Reference |                | 1.00                                | Reference |                |
| Mildly decreased (-13.7 to -1%)                        | 64               | 250                    | 3,638                | 17.6                                              | 1.26                  | 0.90–1.75 | 0.18           | 1.13                                | 0.78–1.64 | 0.52           |
| Severely decreased ( $\leq -13.6\%$ )                  | 74               | 251                    | 3,303                | 22.4                                              | 1.61                  | 1.16–2.24 | <0.01          | 1.63                                | 1.15–2.32 | <0.01          |
| <i>P</i> for trend                                     |                  |                        |                      | <0.01                                             | <0.01                 |           |                | <0.01                               |           |                |
| VaD                                                    |                  |                        |                      |                                                   |                       |           |                |                                     |           |                |
| Increased or unchanged ( $\geq +0\%$ )                 | 41               | 334                    | 5,495                | 7.5                                               | 1.00                  | Reference |                | 1.00                                | Reference |                |
| Mildly decreased (-13.7 to -1%)                        | 26               | 250                    | 3,638                | 7.1                                               | 0.99                  | 0.60–1.62 | 0.96           | 0.89                                | 0.50–1.59 | 0.70           |
| Severely decreased ( $\leq -13.6\%$ )                  | 40               | 251                    | 3,303                | 12.1                                              | 1.81                  | 1.15–2.88 | 0.01           | 1.54                                | 0.91–2.61 | 0.11           |
| <i>P</i> for trend                                     |                  |                        |                      | 0.02                                              | 0.02                  |           |                | 0.12                                |           |                |

AD, Alzheimer's disease; CI, confidence interval; HR, hazard ratio; VaD, vascular dementia.

<sup>a</sup> { (handgrip strength in 1988 / handgrip strength in 1973–1974)-1 } \*100

<sup>b</sup> Per 1,000 person-years

<sup>c</sup> Adjusted for potential confounding covariates measured in 1988—namely, age, sex, education level, systolic blood pressure, use of antihypertensive agents, diabetes mellitus, total cholesterol, body mass index, electrocardiogram abnormalities, smoking habit, alcohol intake, and regular exercise.

**eTable 4.** Hazard ratios for the development of total dementia and its subtypes according to the %change of handgrip strength from midlife (1973–1974) to late-life (1988), in which the categories of increased or unchanged handgrip strength were divided into the median value of %change of handgrip strength among the subjects assigned in either category

| Percent change ratio of handgrip strength <sup>a</sup> | Number of Events | Number of participants | Person-years at risk | Age- and sex-adjusted incidence rate <sup>b</sup> | Age- and sex-adjusted |           |                | Multivariable-adjusted <sup>c</sup> |           |                |  |
|--------------------------------------------------------|------------------|------------------------|----------------------|---------------------------------------------------|-----------------------|-----------|----------------|-------------------------------------|-----------|----------------|--|
|                                                        |                  |                        |                      |                                                   | HR                    | 95% CI    | <i>P</i> value | HR                                  | 95% CI    | <i>P</i> value |  |
| <b>Total dementia</b>                                  |                  |                        |                      |                                                   |                       |           |                |                                     |           |                |  |
| Increased ( $\geq +7\%$ )                              | 72               | 167                    | 2,883                | 25.0                                              | 0.91                  | 0.65–1.28 | 0.59           | 1.08                                | 0.74–1.57 | 0.71           |  |
| Unchanged (+7% to 0%)                                  | 66               | 167                    | 2,612                | 25.3                                              | 1.00                  | Reference |                | 1.00                                | Reference |                |  |
| Mildly decreased (-15 to -1%)                          | 108              | 268                    | 3,802                | 28.4                                              | 1.13                  | 0.83–1.54 | 0.43           | 1.04                                | 0.74–1.48 | 0.81           |  |
| Severe decrease ( $\leq -15\%$ )                       | 122              | 233                    | 3,139                | 38.9                                              | 1.57                  | 1.16–2.14 | <0.01          | 1.56                                | 1.11–2.19 | <0.01          |  |
| <i>P</i> for trend                                     |                  |                        |                      | <0.01                                             | <0.01                 |           |                | 0.02                                |           |                |  |
| <b>AD</b>                                              |                  |                        |                      |                                                   |                       |           |                |                                     |           |                |  |
| Increased ( $\geq +7\%$ )                              | 41               | 167                    | 2,883                | 14.2                                              | 0.88                  | 0.57–1.36 | 0.57           | 0.96                                | 0.58–1.57 | 0.86           |  |
| Unchanged (+7% to 0%)                                  | 40               | 167                    | 2,612                | 15.3                                              | 1.00                  | Reference |                | 1.00                                | Reference |                |  |
| Mildly decreased (-15 to -1%)                          | 68               | 268                    | 3,802                | 17.9                                              | 1.20                  | 0.81–1.78 | 0.36           | 1.14                                | 0.74–1.76 | 0.55           |  |
| Severely decreased ( $\leq -15\%$ )                    | 70               | 233                    | 3,139                | 22.3                                              | 1.49                  | 1.01–2.22 | 0.047          | 1.58                                | 1.03–2.42 | 0.04           |  |
| <i>P</i> for trend                                     |                  |                        |                      | <0.01                                             | <0.01                 |           |                | 0.015                               |           |                |  |
| <b>VaD</b>                                             |                  |                        |                      |                                                   |                       |           |                |                                     |           |                |  |
| Increased ( $\geq +7\%$ )                              | 20               | 167                    | 2,883                | 6.9                                               | 0.76                  | 0.41–1.40 | 0.37           | 1.19                                | 0.58–2.46 | 0.63           |  |
| Unchanged (+7% to 0%)                                  | 21               | 167                    | 2,612                | 8.0                                               | 1.00                  | Reference |                | 1.00                                | Reference |                |  |
| Mildly decreased (-15 to -1%)                          | 28               | 268                    | 3,802                | 7.4                                               | 0.89                  | 0.50–1.57 | 0.69           | 0.99                                | 0.50–1.98 | 0.98           |  |
| Severely decreased ( $\leq -15\%$ )                    | 38               | 233                    | 3,139                | 12.1                                              | 1.55                  | 0.90–2.69 | 0.12           | 1.70                                | 0.88–3.30 | 0.11           |  |
| <i>P</i> for trend                                     |                  |                        |                      | 0.02                                              | 0.02                  |           |                | 0.24                                |           |                |  |

AD, Alzheimer's disease; CI, confidence interval; HR, hazard ratio; VaD, vascular dementia.

<sup>a</sup> { (handgrip strength in 1988 / handgrip strength in 1973–1974)-1 } \* 100

<sup>b</sup> Per 1,000 person-years

<sup>c</sup> Adjusted for potential confounding covariates measured in 1988—namely, age, sex, education level, systolic blood pressure, use of antihypertensive agents, diabetes mellitus, total cholesterol, body mass index, electrocardiogram abnormalities, smoking habit, alcohol intake, and regular exercise.

**eTable 5.** Hazard ratios for composite endpoint of dementia subtypes according to handgrip strength levels in late-life or midlife

|                                                                     | Number of events | Number of participants | Ordinary Cox model |           |         | Fine and Gray model |           |         |
|---------------------------------------------------------------------|------------------|------------------------|--------------------|-----------|---------|---------------------|-----------|---------|
|                                                                     |                  |                        | HR                 | 95% CI    | P value | HR                  | 95% CI    | P value |
| <b>AD</b>                                                           |                  |                        |                    |           |         |                     |           |         |
| <b>Late-life handgrip strength levels (in 1988) <sup>a</sup></b>    |                  |                        |                    |           |         |                     |           |         |
| High                                                                | 94               | 404                    | 1.00               | Reference |         | 1.00                | Reference |         |
| Medium                                                              | 88               | 330                    | 1.37               | 0.99–1.90 | 0.06    | 1.23                | 0.90–1.55 | 0.22    |
| Low                                                                 | 91               | 321                    | 1.94               | 1.41–2.67 | <0.01   | 1.52                | 1.20–1.83 | <0.01   |
| <b>Midlife handgrip strength levels (in 1973–1974) <sup>b</sup></b> |                  |                        |                    |           |         |                     |           |         |
| High                                                                | 74               | 295                    | 1.00               | Reference |         | 1.00                | Reference |         |
| Medium                                                              | 70               | 286                    | 0.94               | 0.67–1.30 | 0.70    | 0.97                | 0.65–1.30 | 0.86    |
| Low                                                                 | 75               | 254                    | 1.46               | 1.05–2.03 | 0.02    | 1.25                | 0.93–1.57 | 0.18    |
| <b>%Change ratio (from 1973–1974 to 1988) <sup>a</sup></b>          |                  |                        |                    |           |         |                     |           |         |
| Increased or unchanged ( $\geq +0\%$ )                              | 81               | 334                    | 1.00               | Reference |         | 1.00                | Reference |         |
| Mildly decreased (-14 to -1%)                                       | 68               | 268                    | 1.17               | 0.81–1.68 | 0.41    | 1.03                | 0.67–1.39 | 0.87    |
| Severely decreased ( $\leq -15\%$ )                                 | 70               | 233                    | 1.62               | 1.13–2.31 | <0.01   | 1.32                | 0.96–1.68 | 0.13    |
| <b>VaD</b>                                                          |                  |                        |                    |           |         |                     |           |         |
| <b>Late-life handgrip strength levels (in 1988) <sup>a</sup></b>    |                  |                        |                    |           |         |                     |           |         |
| High                                                                | 51               | 404                    | 1.00               | Reference |         | 1.00                | Reference |         |
| Medium                                                              | 39               | 330                    | 1.22               | 0.76–1.98 | 0.41    | 1.06                | 0.58–1.54 | 0.81    |
| Low                                                                 | 55               | 321                    | 2.07               | 1.32–3.25 | <0.01   | 1.69                | 1.23–2.14 | 0.02    |
| <b>Midlife handgrip strength levels (in 1973–1974) <sup>b</sup></b> |                  |                        |                    |           |         |                     |           |         |
| High                                                                | 37               | 295                    | 1.00               | Reference |         | 1.00                | Reference |         |
| Medium                                                              | 37               | 286                    | 0.95               | 0.60–1.51 | 0.84    | 0.98                | 0.53–1.44 | 0.94    |
| Low                                                                 | 33               | 254                    | 1.07               | 0.66–1.74 | 0.79    | 1.05                | 0.56–1.54 | 0.85    |
| <b>%Change ratio (from 1973–1974 to 1988) <sup>a</sup></b>          |                  |                        |                    |           |         |                     |           |         |
| Increased or unchanged ( $\geq +0\%$ )                              | 41               | 334                    | 1.00               | Reference |         | 1.00                | Reference |         |
| Mildly decreased (-14 to -1%)                                       | 28               | 268                    | 0.91               | 0.51–1.60 | 0.73    | 0.79                | 0.21–1.36 | 0.42    |
| Severely decreased ( $\leq -15\%$ )                                 | 38               | 233                    | 1.55               | 0.91–2.64 | 0.10    | 1.32                | 0.79–1.86 | 0.31    |

AD, Alzheimer's disease; CI, confidence interval; HR, hazard ratio; VaD, vascular dementia.

<sup>a</sup> Adjusted for potential confounding covariates measured in 1988 for the analysis of late-life handgrip strength—namely, age, sex, education level, systolic blood pressure, use of antihypertensive agents, diabetes mellitus, total cholesterol, body mass index, electrocardiogram abnormalities, smoking habit, alcohol intake, and regular exercise.

<sup>b</sup> Adjusted for potential confounding covariates measured in 1973–1974 for the analysis of midlife handgrip strength—namely, age, sex, education level, systolic blood pressure, use of antihypertensive agents, diabetes mellitus, total cholesterol, body mass index, electrocardiogram abnormalities, smoking habit, and alcohol intake.
